# Supplementary material
Source: MDPI journal article supplement (https://www.mdpi.com/2073-4441/10/11/1636)
Supplement: s1 [file s1]

# Sharp Interface Approach for Regional and Well Scale Modeling of Small Island Freshwater Lens: Tongatapu Island

Roshina Babu <sup>1</sup>, Namsik Park <sup>1,\*</sup>, Sunkwon Yoon <sup>2</sup> and Taaniela Kula <sup>3</sup>

<sup>1</sup> Department of Civil Engineering, Dong-A University, Busan, 49315, Korea; roshinababu@gmail.com

<sup>2</sup> Integrative Climate Research Team, APEC Climate Center, Busan, 48058, Korea; skyoon@apcc21.org

<sup>3</sup> Ministry of Lands & Natural Resources, Nuku'alofa, Tonga; taanielakula@gmail.com

\* Correspondence: nspark@dau.ac.kr; Tel: +82-51-200-7629

Received: 28 September 2018; Accepted: 9 November 2018; Published: date

## Supplementary Data

**Table S1.** WATBAL parameters.

| Parameter                                          | Method/Values Adopted                                   | Reference |
|----------------------------------------------------|---------------------------------------------------------|-----------|
| Monthly evaporation                                | Penman Method                                           | [22]      |
| Interception storage by vegetation                 | 90 mm                                                   | [22]      |
| Soil moisture zone                                 | 1 m                                                     | [22]      |
| Field capacity                                     | 55%                                                     | [22] [36] |
| Wilting point                                      | 40%                                                     | [22] [36] |
| Surface areas covered by deep rooted vegetation    | 30% of lens area                                        | [22]      |
| Transpiration from water table                     | Tree roots are not long enough to reach the water table | [22]      |
| Evapotranspiration from taro pits and roof capture | Not included                                            |           |

**Table S2.** Freshwater resources for decreased recharge rates and percentage decrease compared to base scenario.

| Parameters                                        |         | 69% Recharge | Percentage Decrease | 65% Recharge | Percentage Decrease | 60% Recharge | Percentage Decrease |
|---------------------------------------------------|---------|--------------|---------------------|--------------|---------------------|--------------|---------------------|
| Maximum freshwater head (m)                       |         | 0.274        | 16.8                | 0.264        | 19.6                | 0.254        | 22.8                |
| Minimum interface elevation(m)                    |         | −11.40       | 16.9                | −11.02       | 19.7                | −10.58       | 22.9                |
| Freshwater thickness (m)                          | Maximum | 11.67        | 16.9                | 11.28        | 19.7                | 10.83        | 22.9                |
|                                                   | Average | 6.74         | 19.8                | 6.48         | 22.9                | 6.20         | 26.2                |
| Area (km <sup>2</sup> ) where lens thickness is   | >5 m    | 187.2        | 9.4                 | 182.8        | 11.5                | 176.5        | 14.6                |
|                                                   | >7 m    | 123.9        | 26.0                | 114.9        | 31.4                | 103.8        | 38.0                |
|                                                   | >10 m   | 32.2         | 61.3                | 23.7         | 71.5                | 13.2         | 84.2                |
| Volume(MCM) of freshwater where lens thickness is | >0 m    | 521.9        | 18.0                | 503.5        | 20.9                | 482.5        | 24.2                |
|                                                   | >5 m    | 449.6        | 22.7                | 427.2        | 26.5                | 400.0        | 31.2                |
|                                                   | >7 m    | 334.1        | 34.5                | 303.6        | 40.5                | 268.1        | 47.4                |
|                                                   | >10 m   | 103.6        | 64.9                | 75.0         | 74.6                | 40.9         | 86.1                |

**Table S3.** Freshwater resources for increased pumping and percentage decrease compared to base scenario.

| Parameters                                                     |         | 160%<br>Pumping | Percentage<br>Decrease | 180%<br>Pumping | Percentage<br>Decrease | 200%<br>Pumping | Percentage<br>Decrease |
|----------------------------------------------------------------|---------|-----------------|------------------------|-----------------|------------------------|-----------------|------------------------|
| Maximum freshwater head (m)                                    |         | 0.328           | 0.3                    | 0.328           | 0.4                    | 0.327           | 0.6                    |
| Minimum interface elevation(m)                                 |         | -13.67          | 0.4                    | -13.65          | 0.5                    | -13.63          | 0.7                    |
| Freshwater<br>thickness (m)                                    | Maximum | 13.99           | 0.4                    | 13.98           | 0.5                    | 13.95           | 0.7                    |
|                                                                | Average | 7.97            | 5.2                    | 7.87            | 6.3                    | 7.80            | 7.1                    |
| Area (km <sup>2</sup> )<br>where lens<br>thickness is          | >5 m    | 205.5           | 0.5                    | 205.0           | 0.8                    | 204.5           | 1.0                    |
|                                                                | >7 m    | 163.0           | 2.6                    | 161.8           | 3.3                    | 161.0           | 3.8                    |
|                                                                | >10 m   | 76.1            | 8.5                    | 74.4            | 10.4                   | 73.0            | 12.1                   |
| Volume<br>(MCM) of<br>freshwater<br>where lens<br>thickness is | >0 m    | 622.5           | 2.2                    | 619.2           | 2.7                    | 616.5           | 3.2                    |
|                                                                | >5 m    | 566.1           | 2.6                    | 562.2           | 3.3                    | 558.9           | 3.9                    |
|                                                                | >7 m    | 488.9           | 4.2                    | 483.7           | 5.2                    | 479.7           | 6.0                    |
|                                                                | >10 m   | 266.9           | 9.5                    | 260.6           | 11.6                   | 255.2           | 13.4                   |
